# Supplementary figures and images for: Lactobacillus plantarum Metabolites Elicit Anticancer Effects by Inhibiting Autophagy-Related Responses
Source: MDPI journal article supplement (doi:10.3390/molecules28041890), 2023-02-16

# Supplementary Materials

Figure S1.

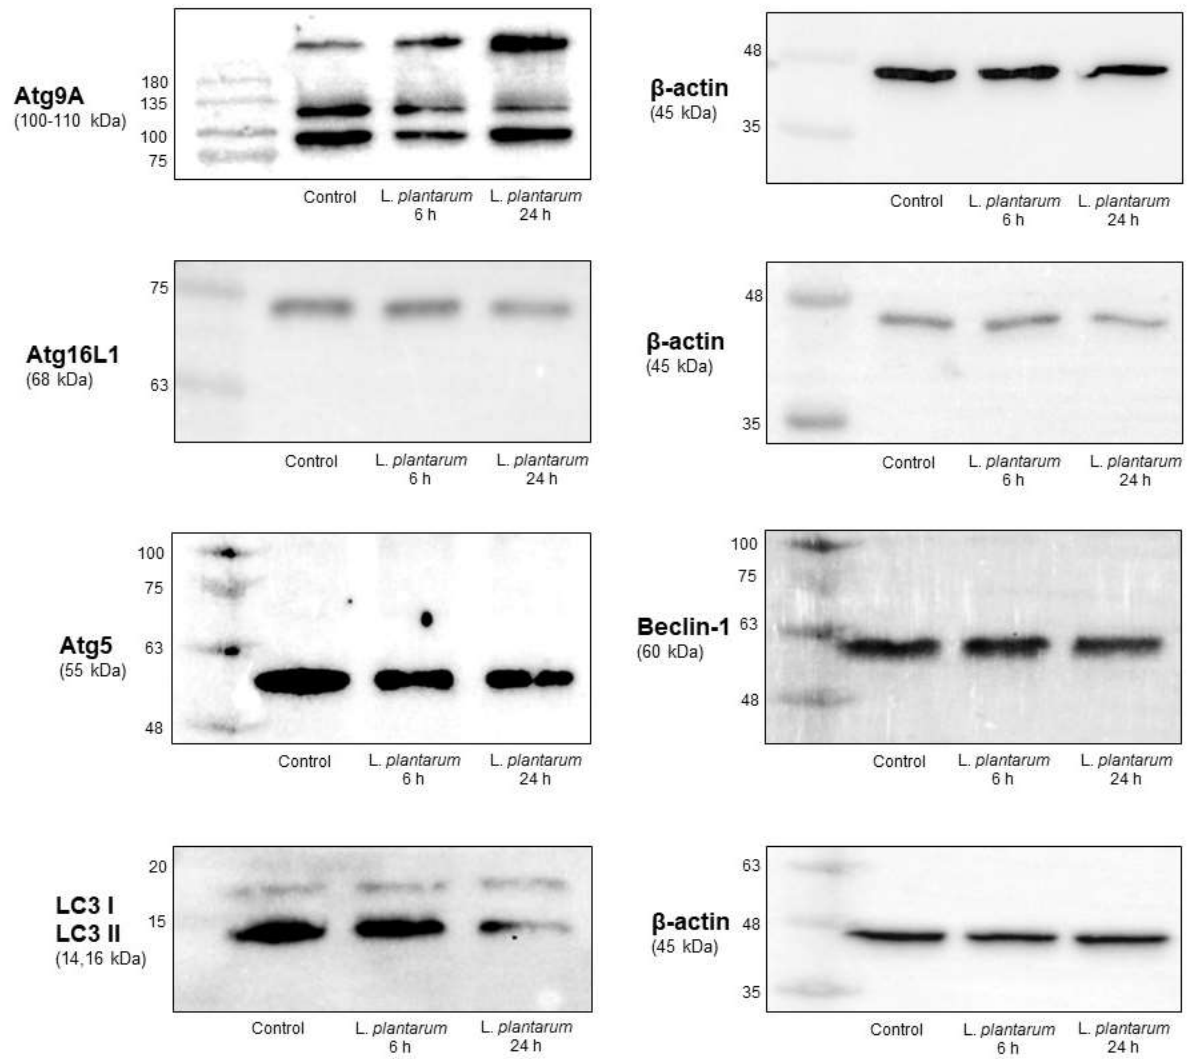

Figure S2.

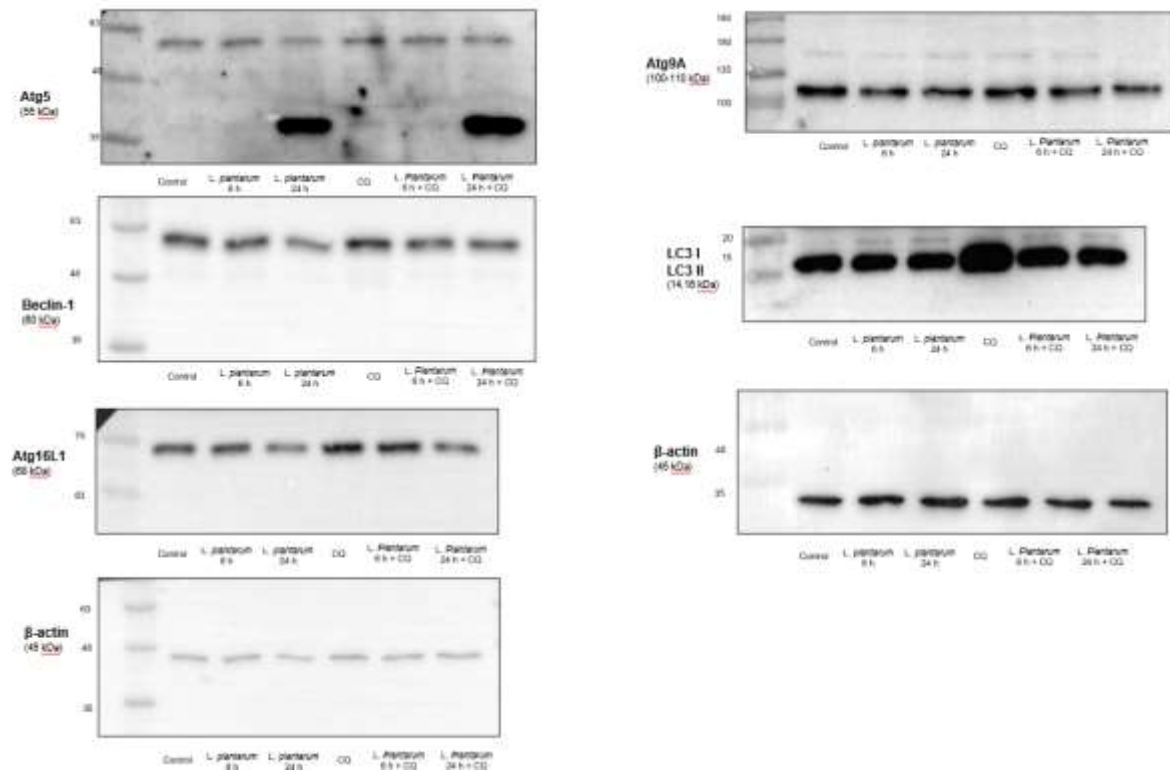

Supplement: s1 [file s1]
